# Supplementary material for: Ral-Arf6 crosstalk regulates Ral dependent exocyst trafficking and anchorage independent growth signalling
Source: PubMed Central journal article supplement (PMC4973806; doi:10.1016/j.cellsig.2016.05.023), 2016-09

Supplementary Figure S1 : Pawar et al.

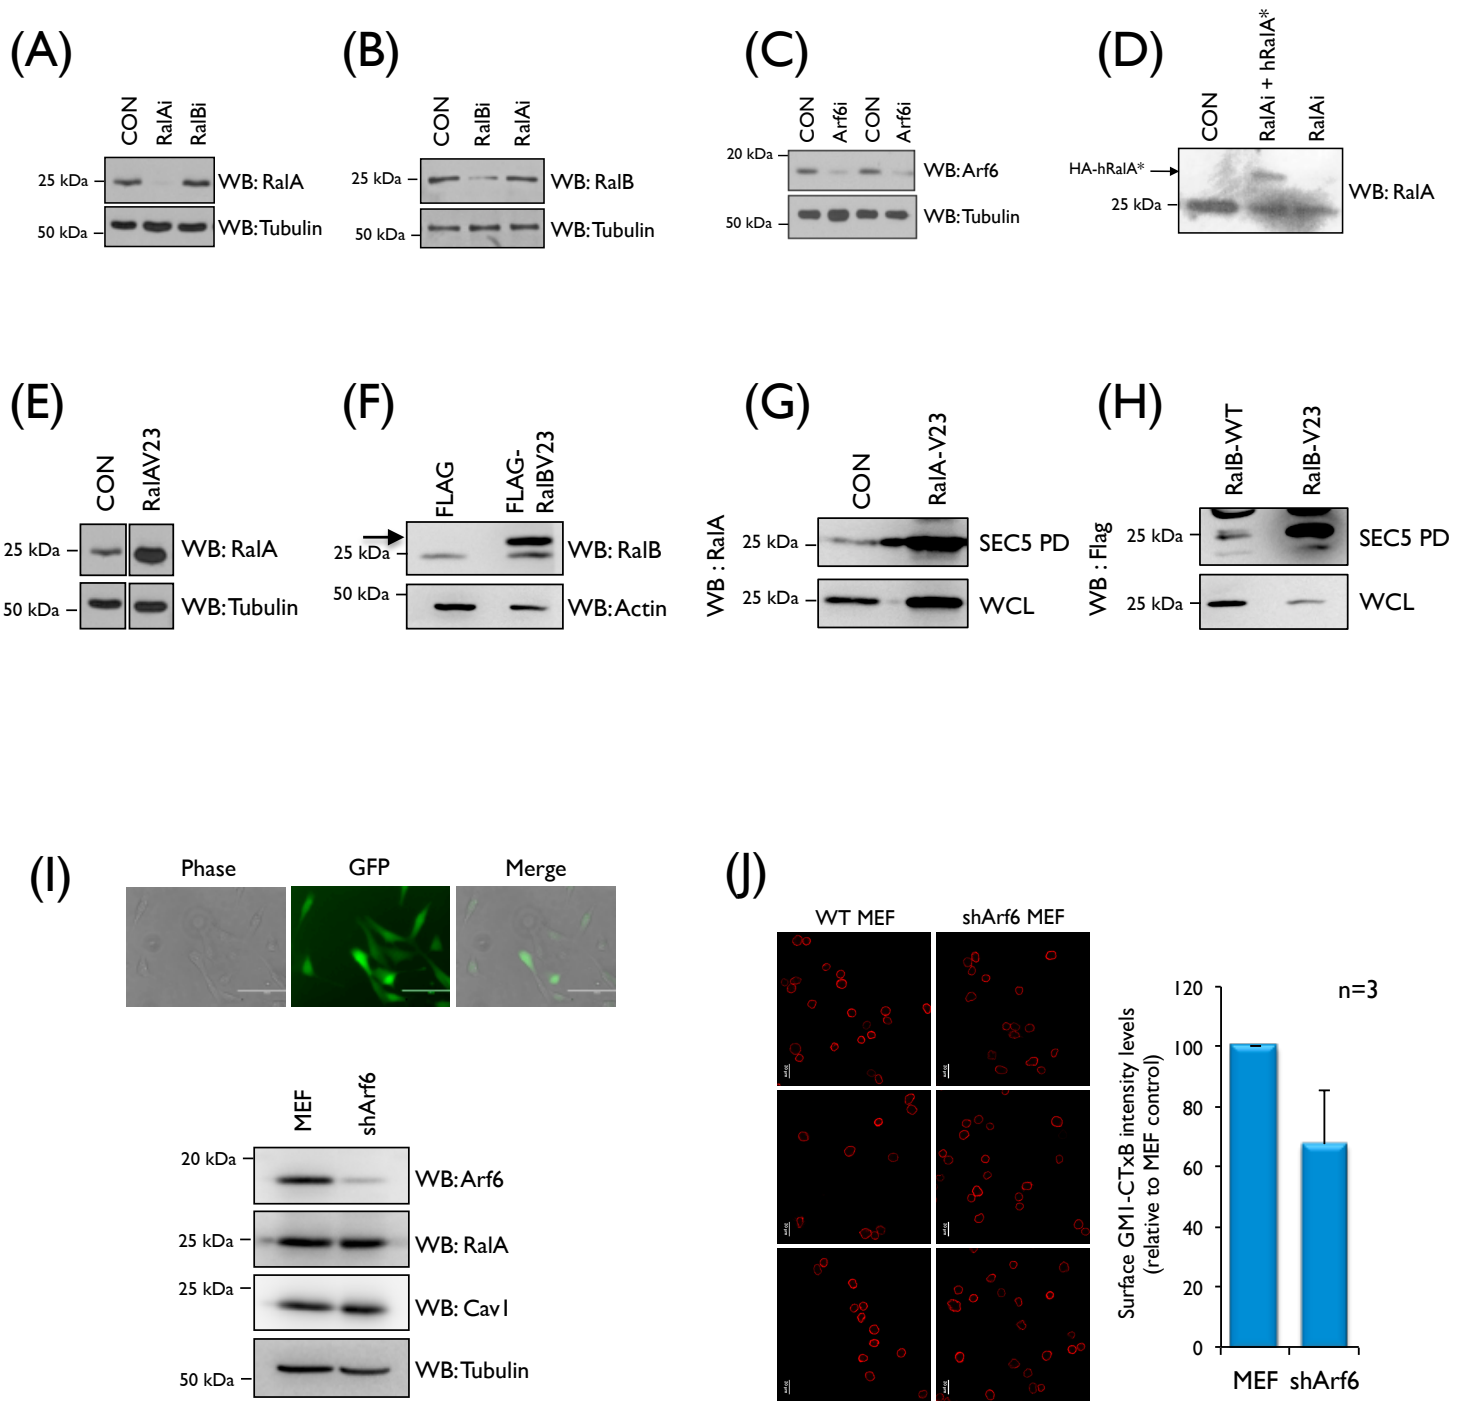

Supplementary Figure S1 : Pawar et. al.

(K)

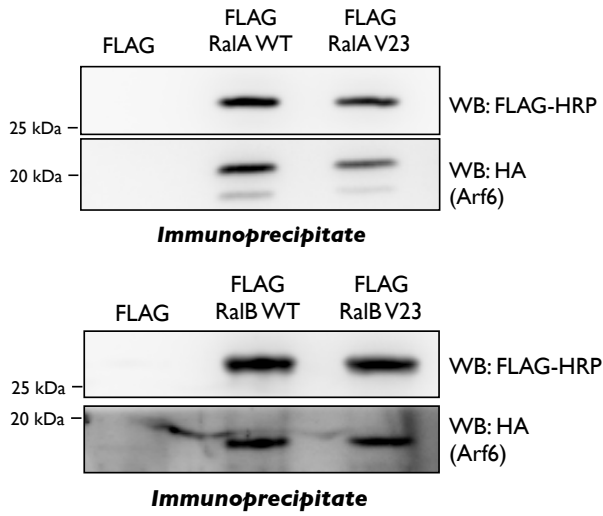

(L)

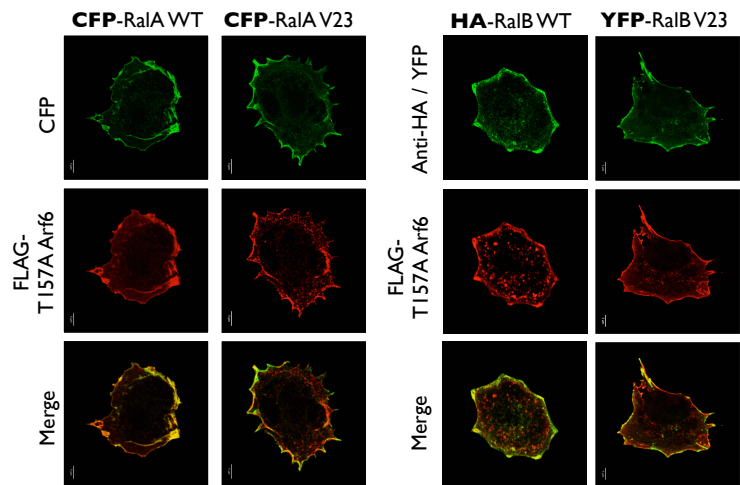

(M)

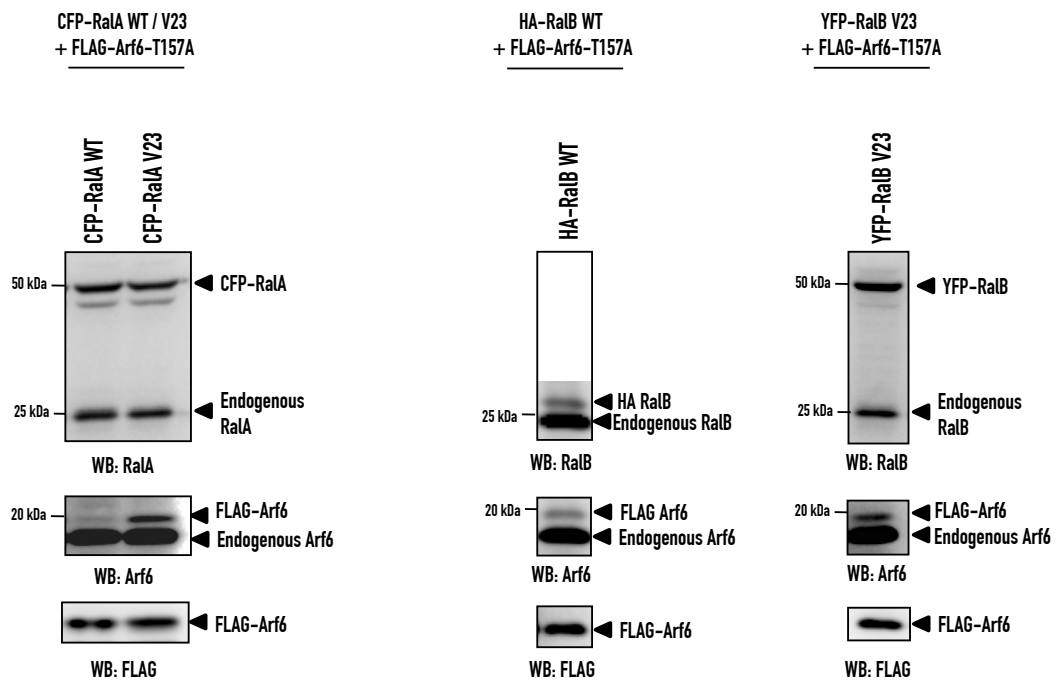

Supplementary Figure S2 : Pawar et. al.

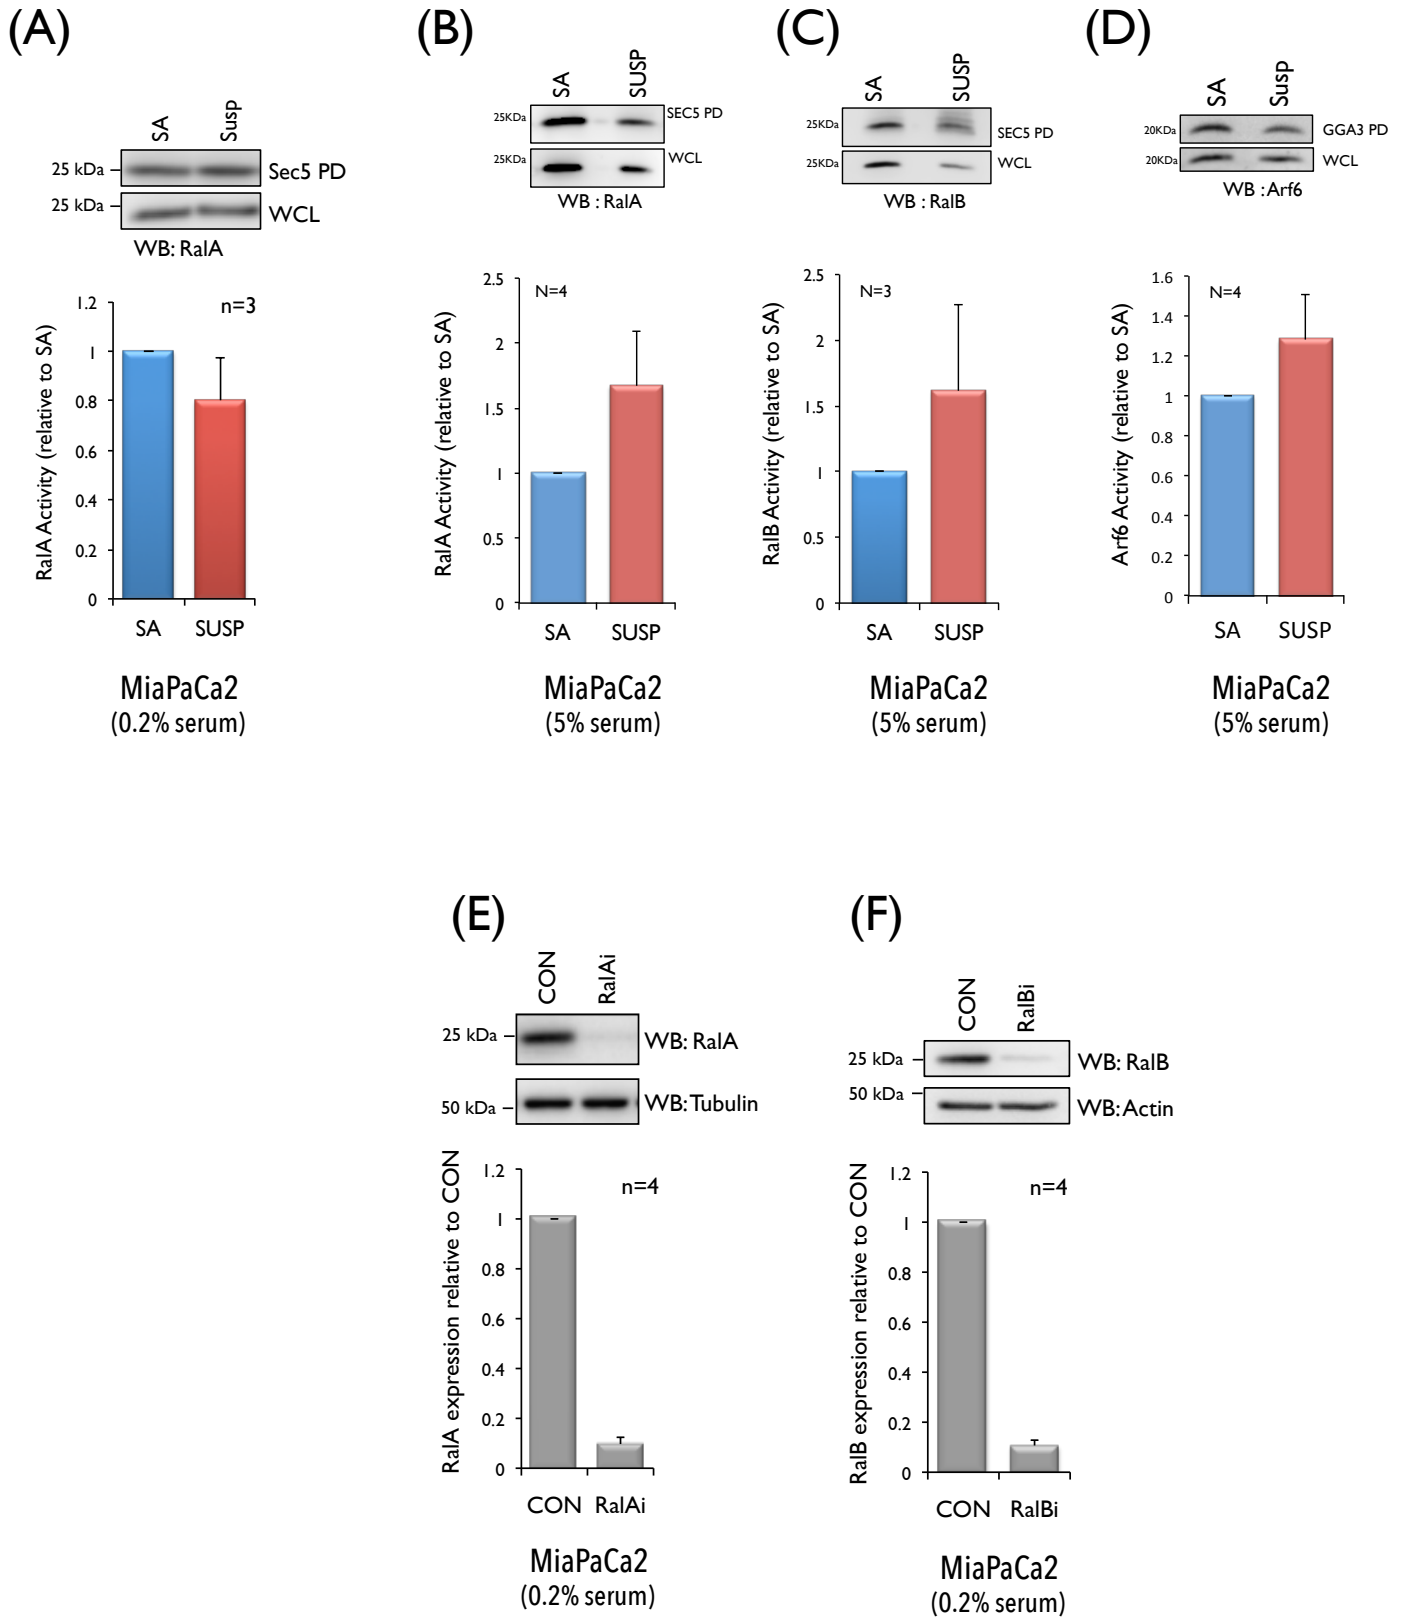

Supplementary Figure S2 : Pawar et. al.

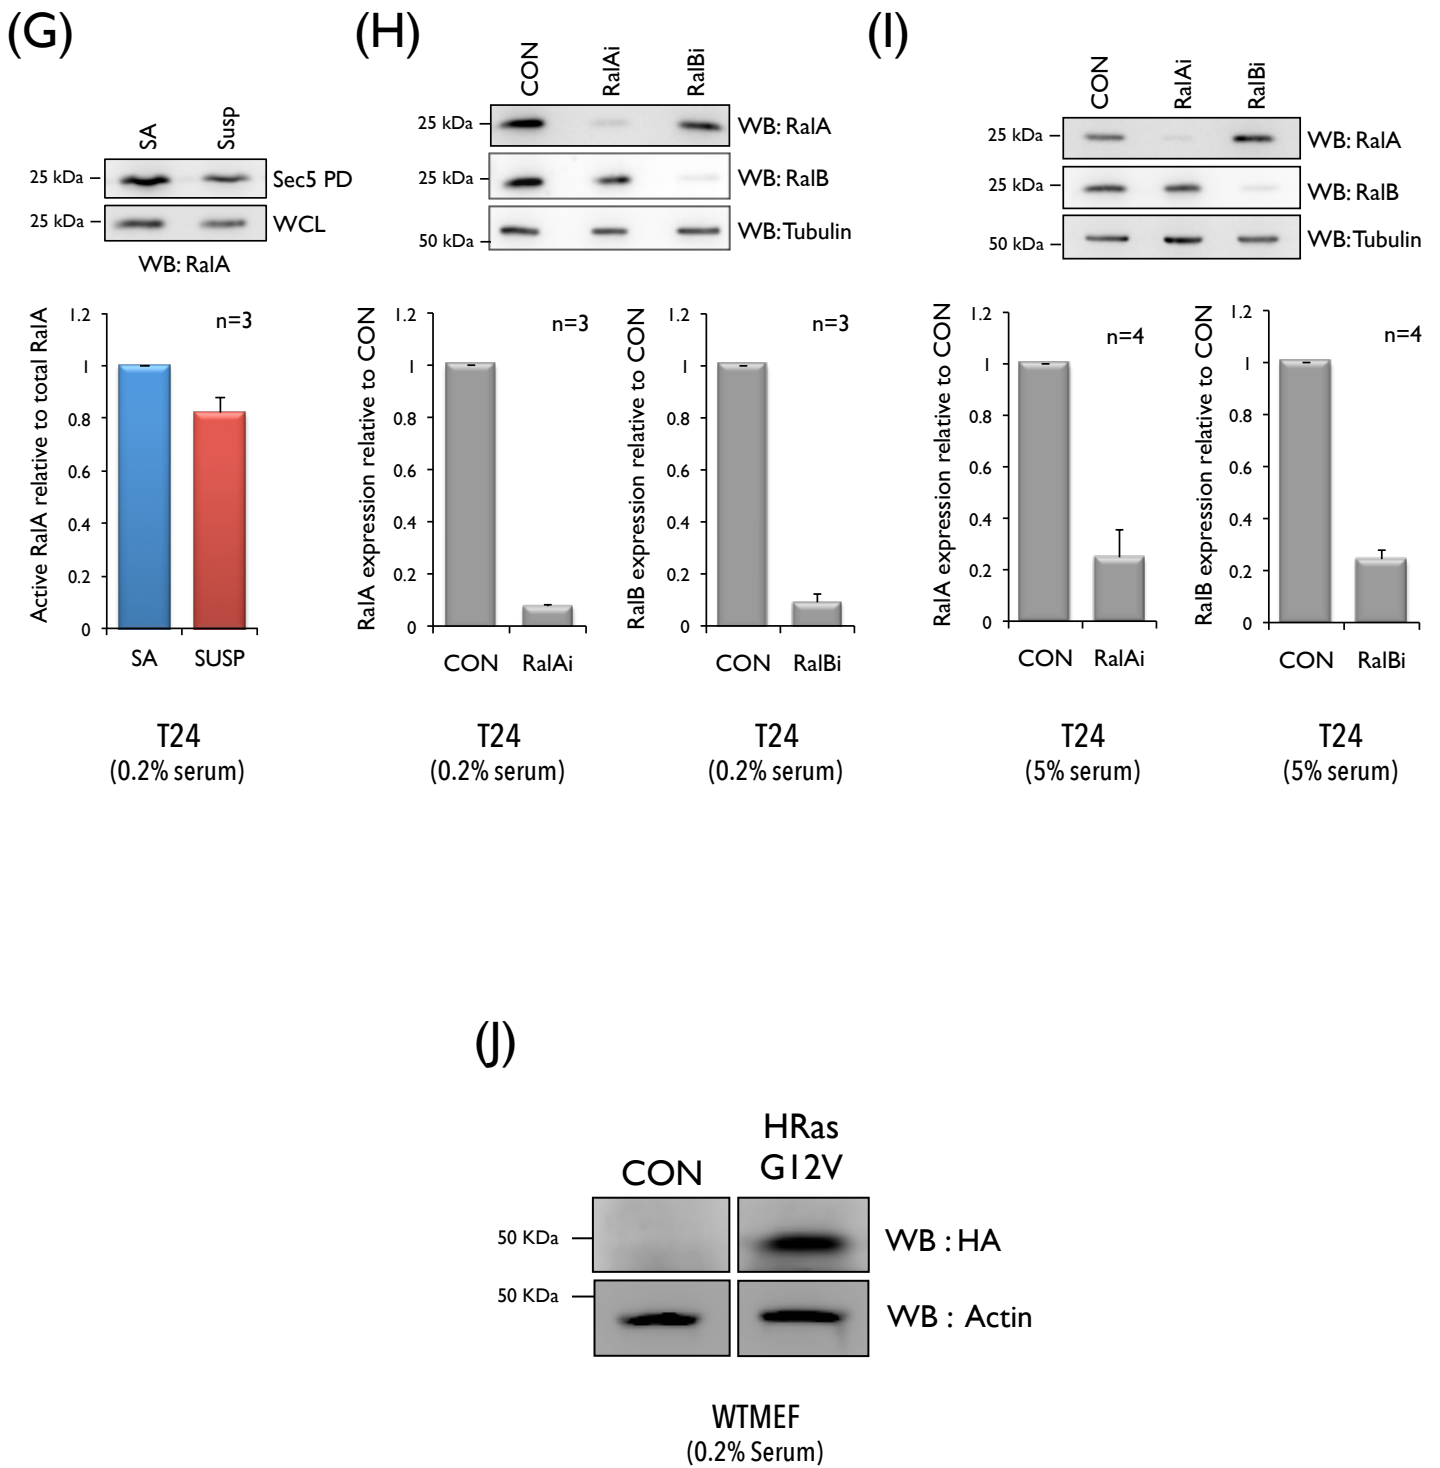

Supplementary Figure S3 : Pawar et. al.

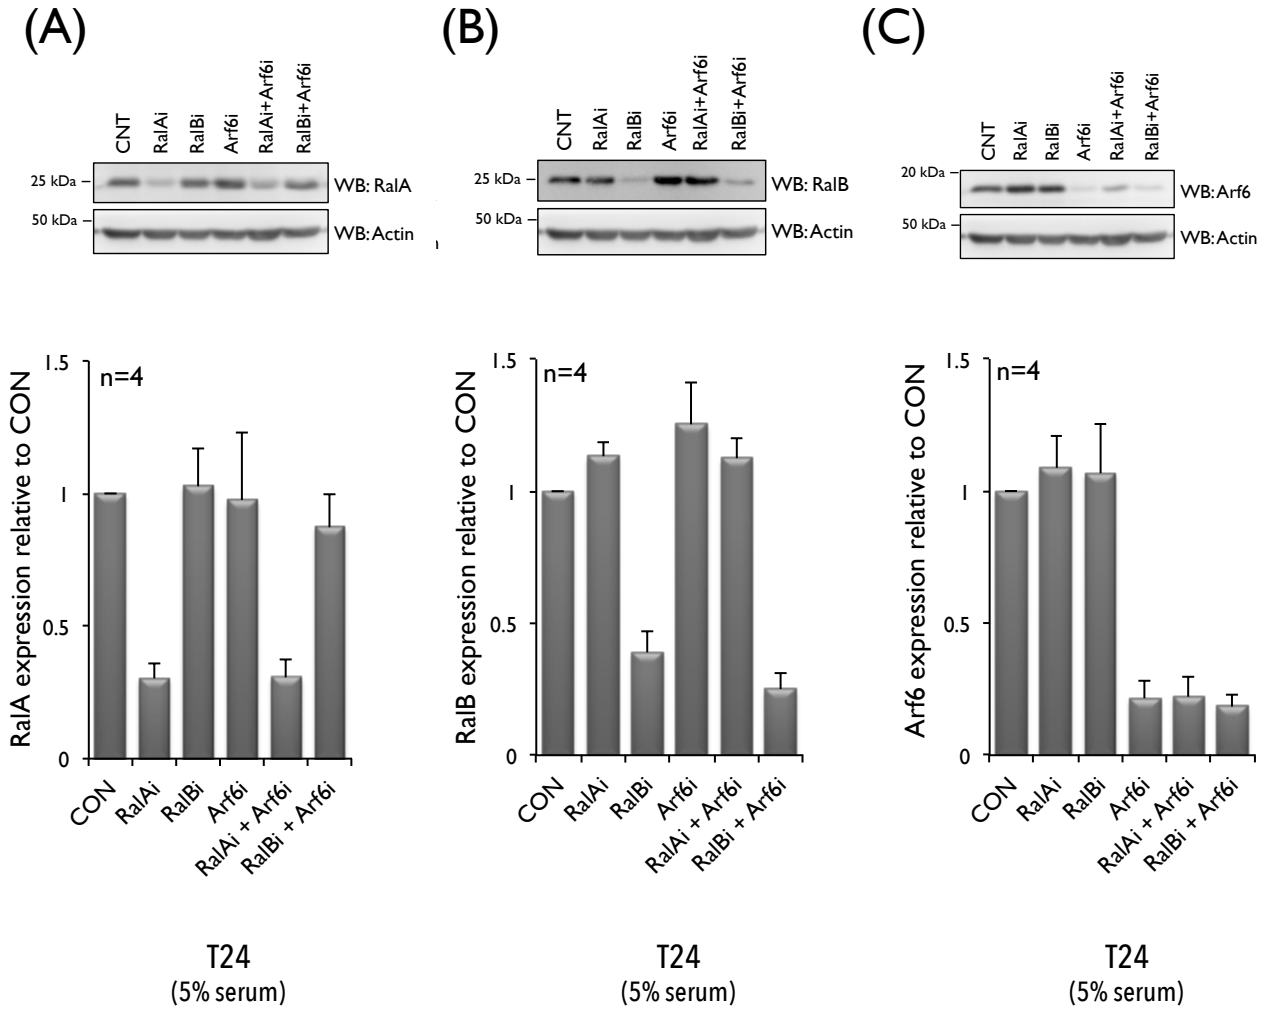

Supplementary Figure S4 : Pawar et. al.

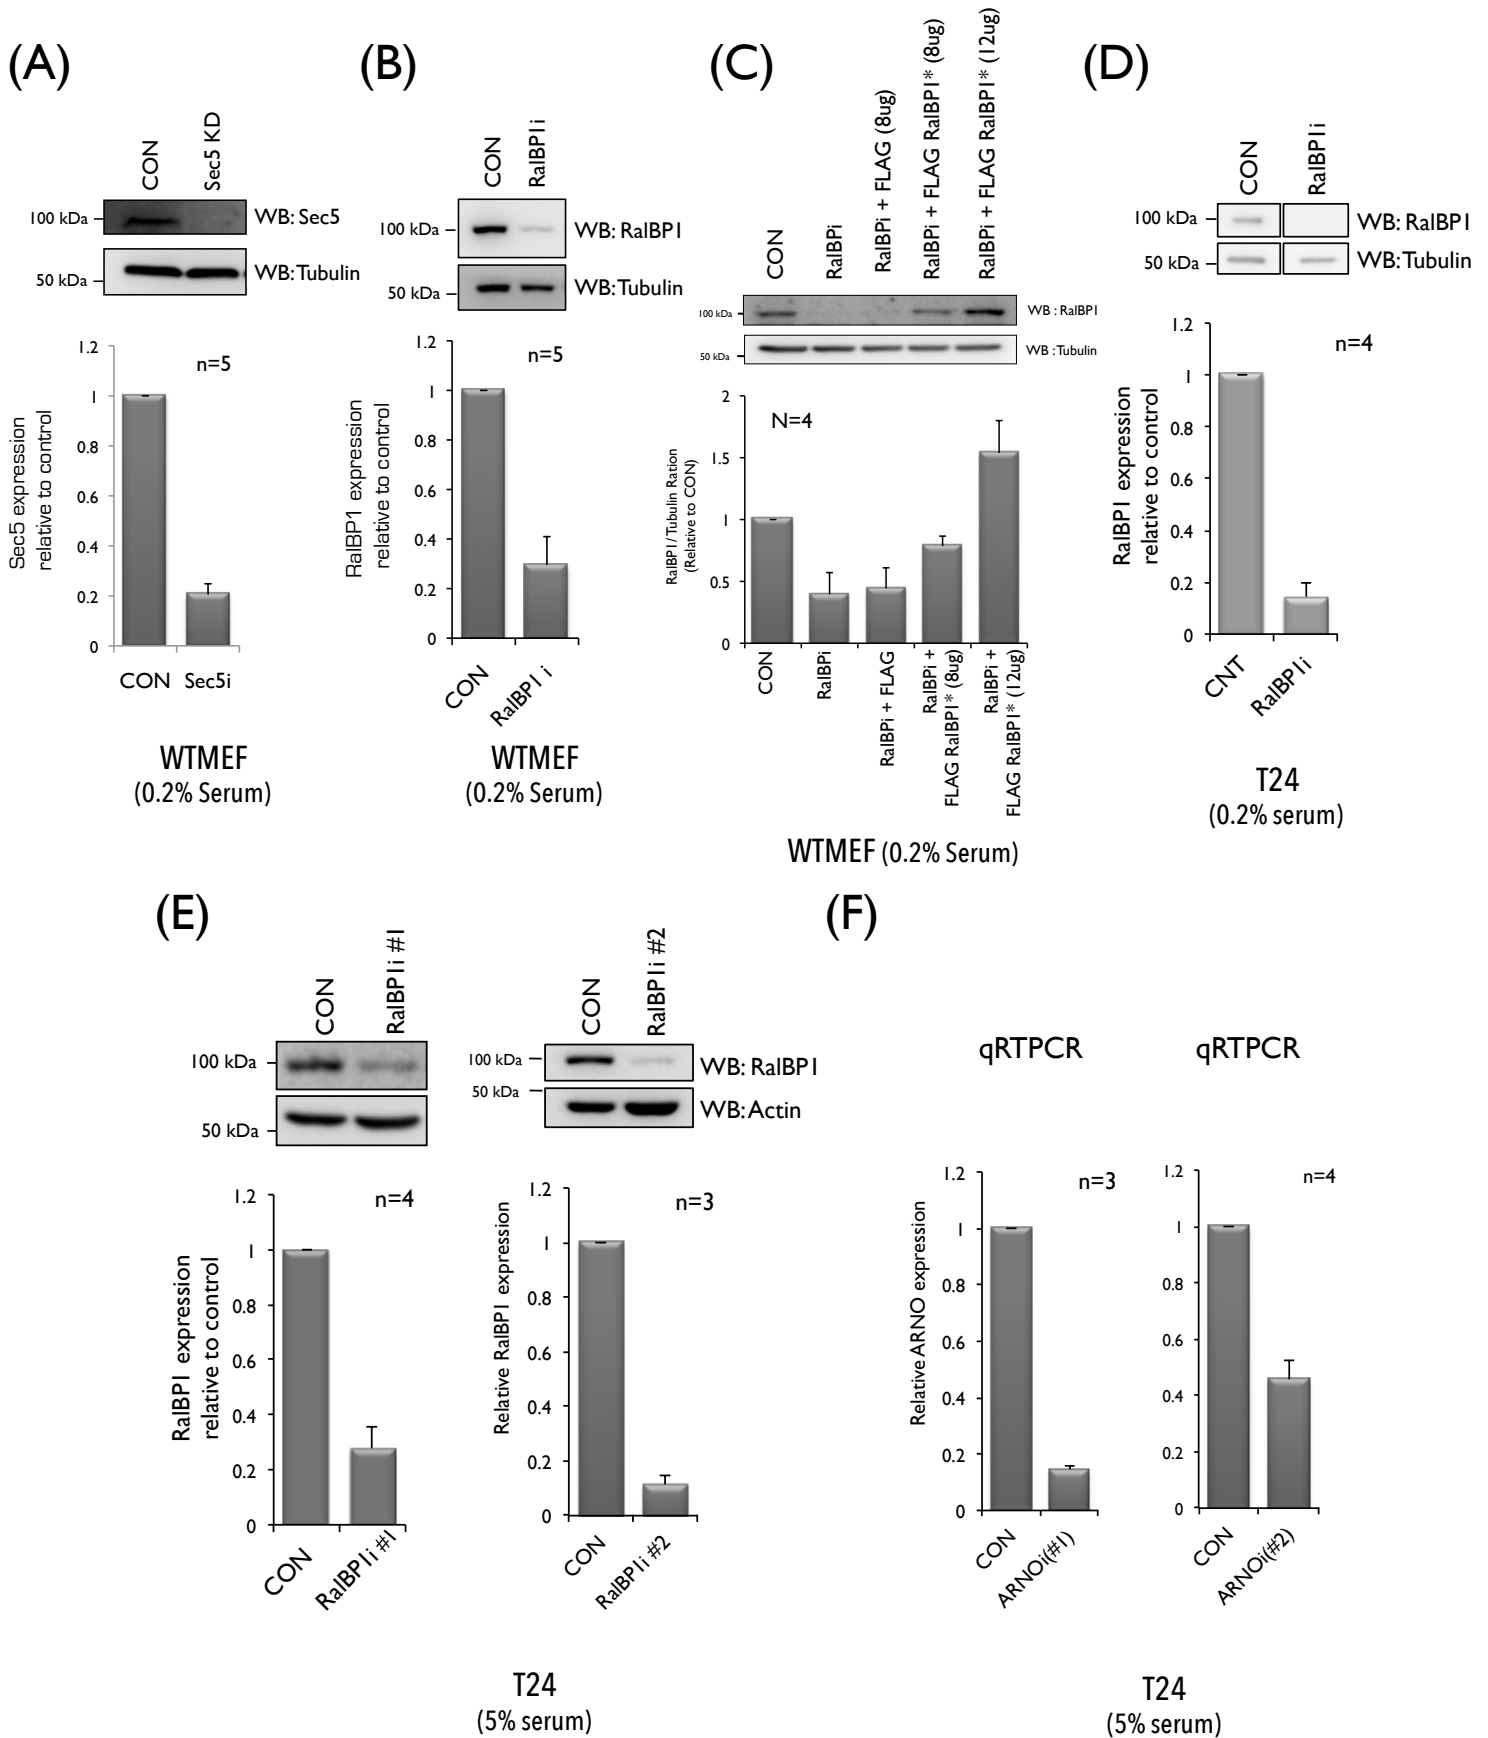

Supplementary Figure S4 : Pawar et. al.

(G)

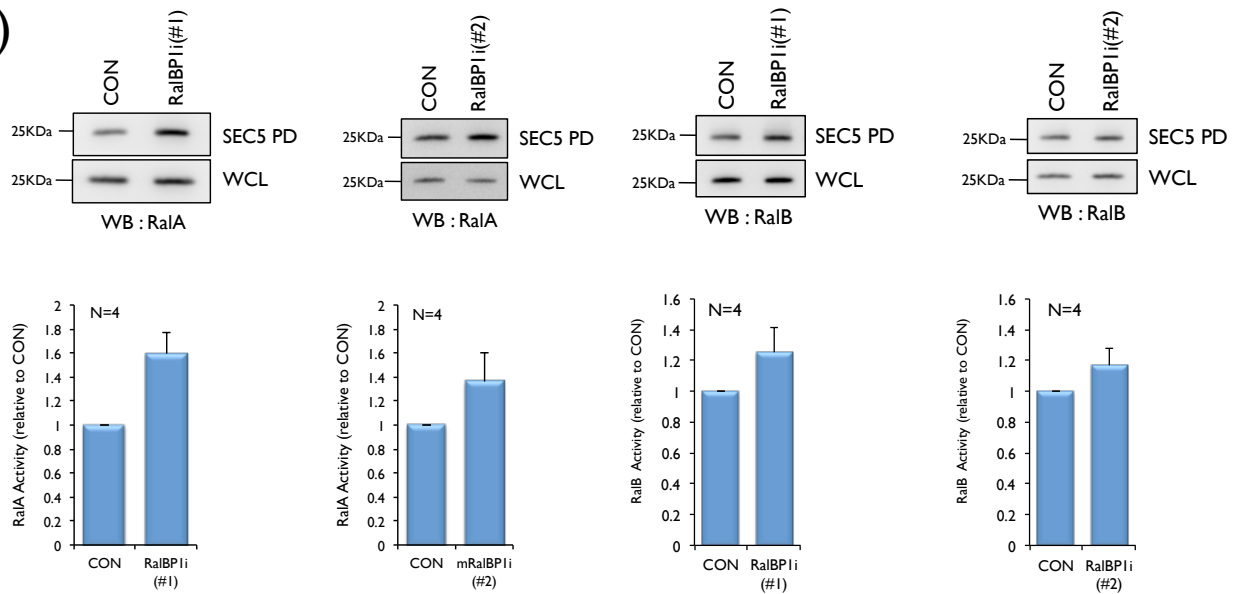

(H)

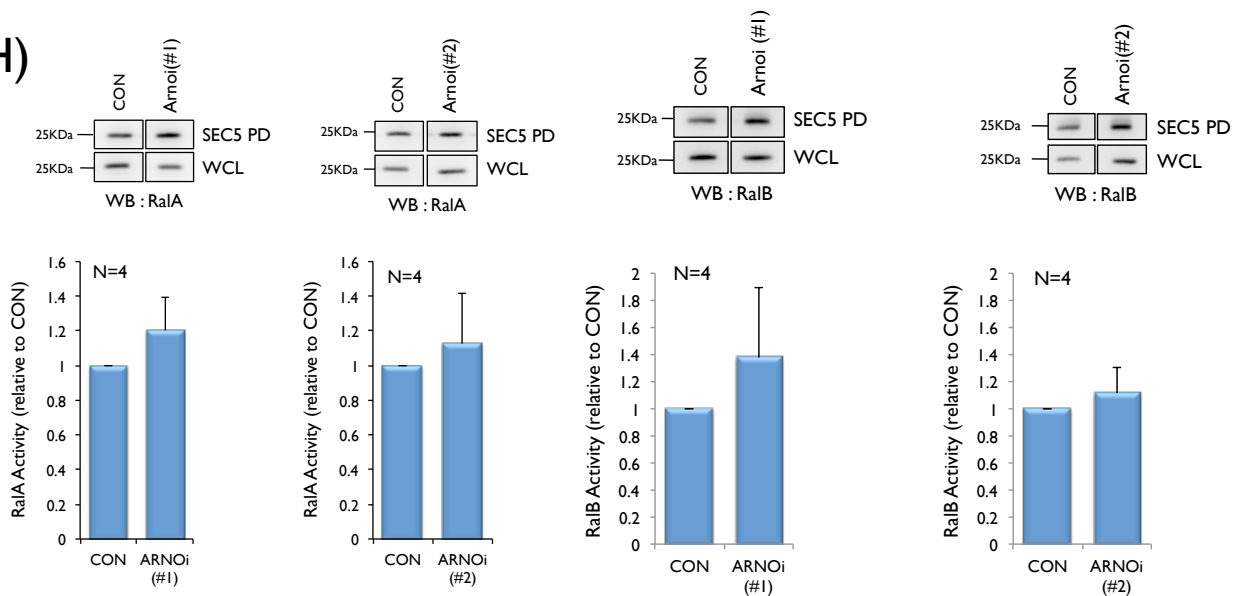

(I)

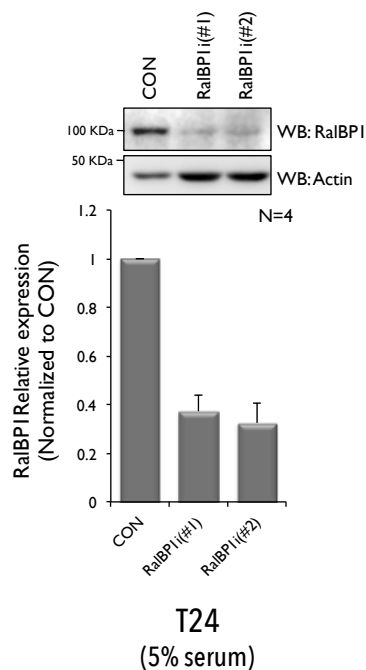

(J)

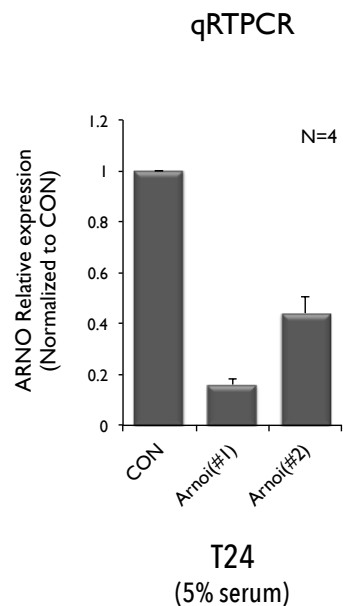

Supplementary Figure S4 : Pawar et. al.

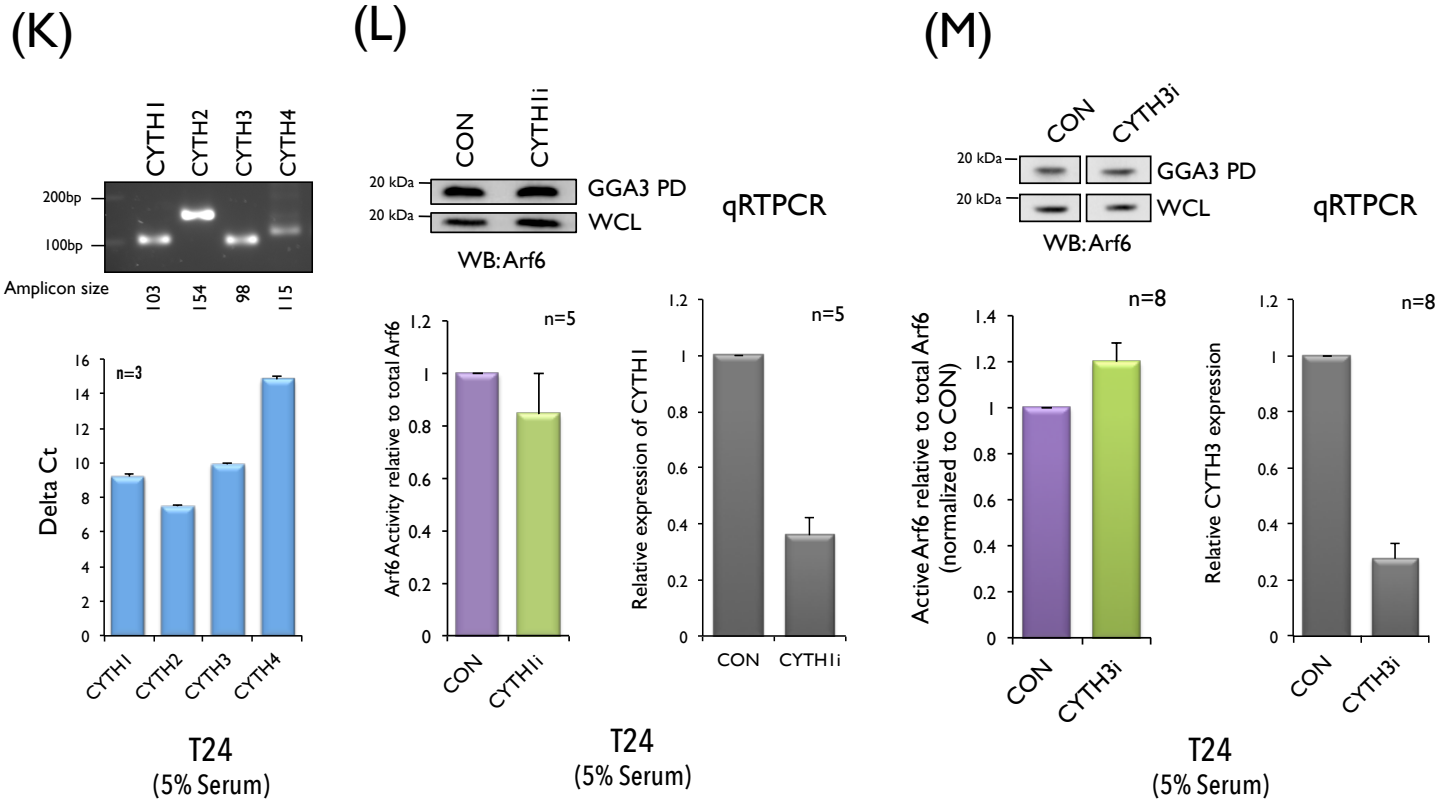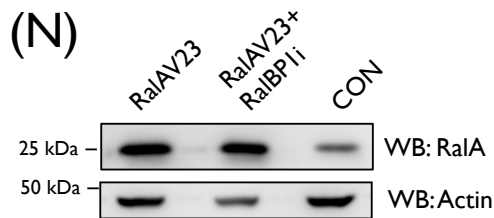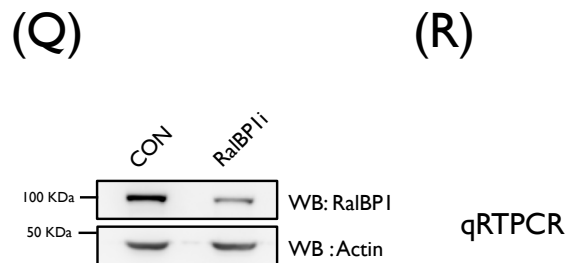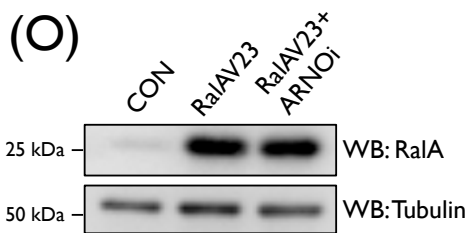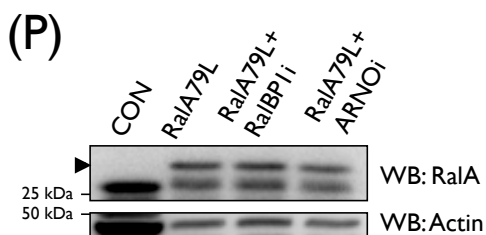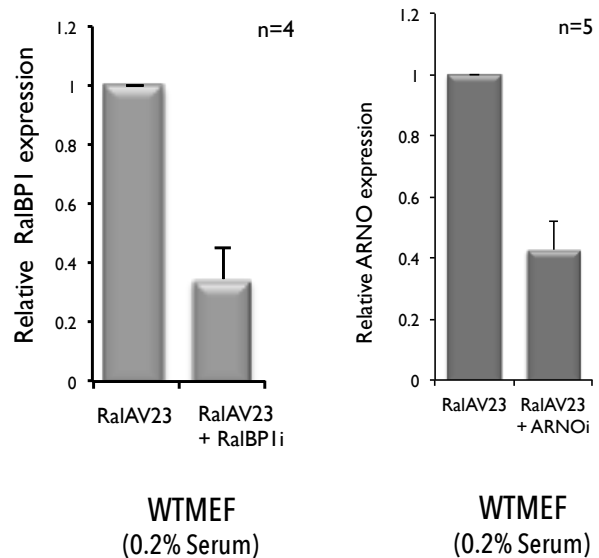

Supplement: mmc1.pdf [file mmc1.pdf]
