# Supplementary material for: Ral-Arf6 crosstalk regulates Ral dependent exocyst trafficking and anchorage independent growth signalling
Source: PubMed Central journal article supplement (PMC4973806; doi:10.1016/j.cellsig.2016.05.023), 2016-09
Supplement: mmc2.pdf [file mmc2.pdf]

### **siRNA sequences used for knockdown.**

mouseRalA : 5'-AAGGCAGGTTTCTGTAGAA-3' [1,2],  
mouseRalB: 5'-GGTGGTTCTCGACGGAGAA-3' [2,3],  
mouseRalBP1: 5'-ACATCATGGTCCTCTCTAC-3' [4],  
sh-mouseArf6:5'-AGCTGCACCGCATTATCAA-3' [5,6],  
humanRalA: 5'-CAGAGCTGAGCAGTGGAAT-3' [7],  
humanRalB: 5'-GGTGATCATGGTTGGCAGC-3' [7],  
humanRalBP1: 5'-GTAGAGAGGACCATGATG-3' [8],  
human RalBP1#2 : 5'-ACATCATGGTCCTCTCTAC-3' [4],  
humanArf6#1: 5'-TCCTCATCTTCGCCAACAA-3' [9] and  
humanArf6#2: 5'-GCACCGCATTATCAATGACCG-3' [9]  
humanCyth3#1: GTCGCCCAGTTCCTTTATA [10]  
humanCyth3#2: CAGCAGAGATCCCTTCTAT [10]  
humanCYTH1: AACGACCTCCTGAAGAACACT [11]  
humanARNO#2 (Cyth2) : AAGATGGCAATGGGCAGGAAG [11]

### **siRNA SMARTPOOL SEQUENCES**

mouse Sec5 ( L-042601)

mSec5\_SM1 AGAAGTATTAGGTCGGAAA  
mSec5\_SM2 TCAACGTACTTCAGCGATT  
mSec5\_SM3 CAGCAGAGATTACACGTCA  
mSec5\_SM4 GTGAGTGGCTTGCGCAGTA

Mouse ARNO ((L-059077)

mARNO\_SM1 TAAGTGAAGCTATGAGCGA  
mARNO\_SM2 CAGAAAATTGATCGAATGA  
mARNO\_SM3 AATTAAGATTCCAGAACGT  
mARNO\_SM4 GCAAGAAAGAAGCGAATTT

Human ARNO #1 (L-011925)

hARNO\_SM1 TGGCAGTGCTCCATGCTTT  
hARNO\_SM2 AAACCGAACTGCTTTGAAC  
hARNO\_SM3 GTAAGACCTTGCAACGGAA  
hARNO\_SM4 GAACACACCCGAGGAGATC

### **RTPCR primers**

mARNO\_F: 5'-CCTTTGCCCAGAGATACTGC-3'  
mARNO\_R: 5'-GGATTGTGAAGGCTGGTGT-3'  
hCYTH1\_F: 5'-GTTTGGCCAGCGATATTGTCAG-3'  
hCYTH1\_R: 5'-GTGCAGACTGGTGTTC AACATG-3'  
hARNO\_F: 5'-TGGTGGAGAATGAACTGCTG-3'  
hARNO\_R: 5'-TCATGCAGATCCACAAAAGC-3'  
hCYTH3\_F: 5'-TGCTACAGAGTTCCCCAGAA-3'  
hCYTH3\_R: 5'-TTCATCCCTTTCACCCAGGTAG-3'  
mActin\_F: 5'-GCTACAGCTTCACCACCACA-3'  
mActin\_R: 5'-TCTCCAGGGAGGAAGAGGAT-3'  
hActin\_F: 5'-GATTCCTATGTGGGCGAC-3'  
hActin\_R: 5'-GGTAGTCAGTCAGGTCCCG-3'

### **Site Directed mutagenesis primers**

R79L\_A: 5'-GGCAGGAGGACTATGCTGCAATTCTAGACA ACTACTTCCGA-3'  
R79L\_B: 5'-TCGGAAGTAGTTGTCTAGAATTGCAGCATAGTCCTCCTGCC-3'  
RalBP1\*A: 5'-TTGGAATTCCTTTGGCTGATGCAGTCGAACGAACTATGATGTATGATGGCATTCCGGCTGC -3'  
RalBP1\*B: 5'-GCAGCCGAATGCCATCATA CATCATAGTTCGTTCTGACTGCATCAGCCAAAGGAATTCCAA -3'

## REFERENCES

- [1] N. Vitale, J. Mawet, J. Camonis, R. Regazzi, M.-F. Bader, S. Chasserot-Golaz, The Small GTPase RalA controls exocytosis of large dense core secretory granules by interacting with ARF6-dependent phospholipase D1, *J. Biol. Chem.* 280 (2005) 29921–29928. doi:10.1074/jbc.M413748200.
- [2] N. Balasubramanian, J.A. Meier, D.W. Scott, A. Norambuena, M.A. White, M.A. Schwartz, RalA-exocyst complex regulates integrin-dependent membrane raft exocytosis and growth signaling, *Curr. Biol.* 20 (2010) 75–79. doi:10.1016/j.cub.2009.11.016.
- [3] G. Li, L. Han, T.-C. Chou, Y. Fujita, L. Arunachalam, A. Xu, et al., RalA and RalB function as the critical GTP sensors for GTP-dependent exocytosis, *Journal of Neuroscience.* 27 (2007) 190–202. doi:10.1523/JNEUROSCI.2537-06.2007.
- [4] L.E. Goldfinger, C. Ptak, E.D. Jeffery, J. Shabanowitz, D.F. Hunt, M.H. Ginsberg, RLIP76 (RalBP1) is an R-Ras effector that mediates adhesion-dependent Rac activation and cell migration, *J. Cell Biol.* 174 (2006) 877–888. doi:10.1083/jcb.200603111.
- [5] S. Choi, J. Ko, J.-R. Lee, H.W. Lee, K. Kim, H.S. Chung, et al., ARF6 and EFA6A regulate the development and maintenance of dendritic spines, *Journal of Neuroscience.* 26 (2006) 4811–4819. doi:10.1523/JNEUROSCI.4182-05.2006.
- [6] N. Balasubramanian, D.W. Scott, J.E. Casanova, M.A. Schwartz, Arf6 and microtubules in adhesion-dependent trafficking of lipid rafts, *Nat. Cell Biol.* 9 (2007) 1381–1391. doi:10.1038/ncb1657.
- [7] G. Oxford, C.R. Owens, B.J. Titus, T.L. Foreman, M.C. Herlevsen, S.C. Smith, et al., RalA and RalB: antagonistic relatives in cancer cell migration, *Cancer Res.* 65 (2005) 7111–7120. doi:10.1158/0008-5472.CAN-04-1957.
- [8] K.-H. Lim, D.C. Brady, D.F. Kashatus, B.B. Ancrile, C.J. Der, A.D. Cox, et al., Aurora-A phosphorylates, activates, and relocalizes the small GTPase RalA, *Mol. Cell. Biol.* 30 (2010) 508–523. doi:10.1128/MCB.00916-08.
- [9] A. Béglé, P. Tryoen-Tóth, J. de Barry, M.-F. Bader, N. Vitale, ARF6 regulates the synthesis of fusogenic lipids for calcium-regulated exocytosis in neuroendocrine cells, *J. Biol. Chem.* 284 (2009) 4836–4845. doi:10.1074/jbc.M806894200.
- [10] Y. Fu, J. Li, M.-X. Feng, X.-M. Yang, Y.-H. Wang, Y.-L. Zhang, et al., Cytohesin-3 is upregulated in hepatocellular carcinoma and contributes to tumor growth and vascular invasion, *Int J Clin Exp Pathol.* 7 (2014) 2123–2132.
- [11] M. Morishige, S. Hashimoto, E. Ogawa, Y. Toda, H. Kotani, M. Hirose, et al., GEP100 links epidermal growth factor receptor signalling to Arf6 activation to induce breast cancer invasion, *Nat. Cell Biol.* 10 (2008) 85–92. doi:10.1038/ncb1672.
